# Supplementary material for: BAMClipper: removing primers from alignments to minimize false-negative mutations in amplicon next-generation sequencing
Source: PubMed Central journal article supplement (PMC5431517; doi:10.1038/s41598-017-01703-6), 2017-05-08
Supplement: 41598_2017_1703_MOESM1_ESM.pdf [file 41598_2017_1703_MOESM1_ESM.pdf]

Supplementary Information for:

## BAMClipper: removing primers from alignments to minimize false-negative mutations in amplicon next-generation sequencing

Chun Hang Au<sup>1</sup>, Dona N. Ho<sup>1</sup>, Ava Kwong<sup>2,3,4</sup>, Tsun Leung Chan<sup>1</sup>, Edmond S. K. Ma<sup>1\*</sup>

**Supplementary Figure S1.** A *BRCA1* deletion escaped from variant calling when primers were trimmed before mapping by BowTie 2.

**Supplementary Figure S2.** Additional simulated indels detected by 3 approaches of primer handling.

**Supplementary Figure S3.** BAMClipper showed improved computing performance and maintained high effectiveness of primer removal.

**Supplementary Table S1.** Comparison of primer handling approaches in detecting known variants from the myeloid neoplasm gene panel.

**Supplementary Note.** Source code of BAMClipper and Cutadapt pipelines used in benchmarking.

**Supplementary Figure S1. A *BRCA1* deletion escaped from variant calling when primers were trimmed before mapping by BowTie 2.** NGS read alignments of *BRCA1* c.1620\_1636del allele from three primer handling approaches are shown in conjunction with the amplicon design and reference genome sequence. Individual forward and reverse sequencing reads after any soft-clipping were represented by red and purple horizontal lines, respectively. The expected deletion event (black box) was present in the alignments from approaches 2 and 3 only.

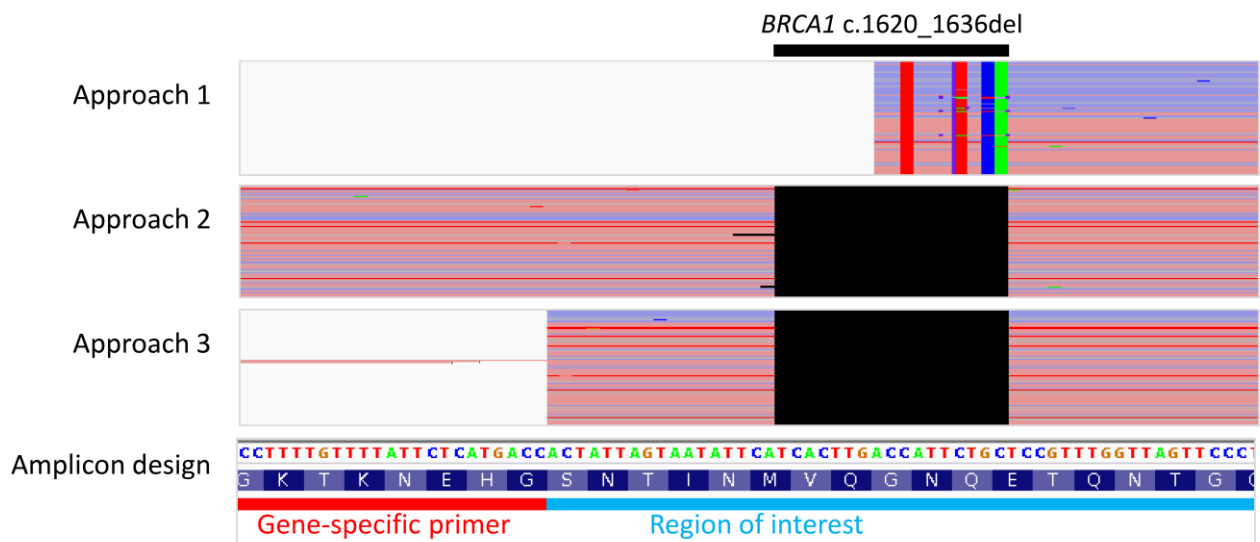

**Supplementary Figure S2.** Additional simulated indels detected by 3 approaches of primer handling.

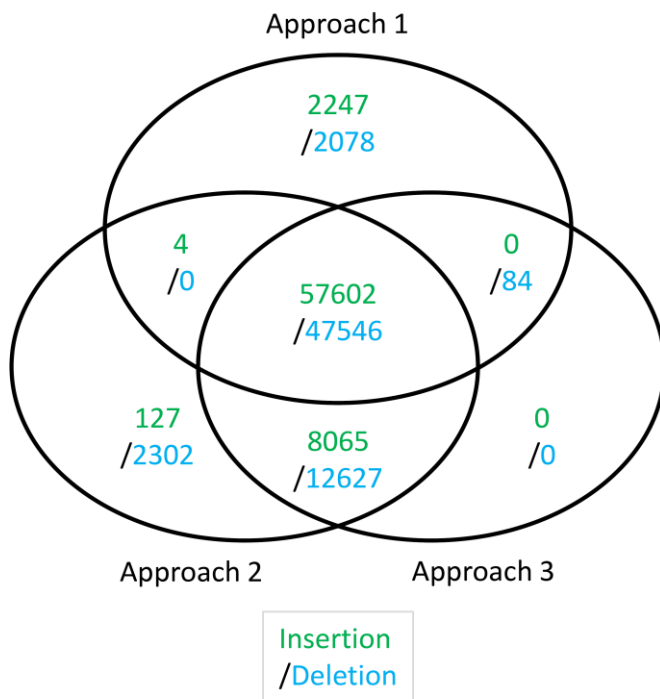

**Supplementary Figure S3. BAMClipper showed improved computing performance and maintained high effectiveness of primer removal.** Computing time of 1 million read pairs for (A) increasing number of amplicons and (B) increasing length of sequencing read. (C) Computing time for increasing number of sequencing read pairs. A linear regression line is also shown for each method. (A-C) Computing time of BAMClipper or Cutadapt alone was shown as “BAMClipper only” and “Cutadapt only”, respectively. Overall computing time from FASTQ to primer trimmed/clipped BAM files (including read alignment time) was shown as “BAMClipper overall” and “Cutadapt overall”. (D) Mean decrease of alignment depth of region of interest or gene-specific primer sites of individual amplicons. Error bars represent 1 standard deviation.

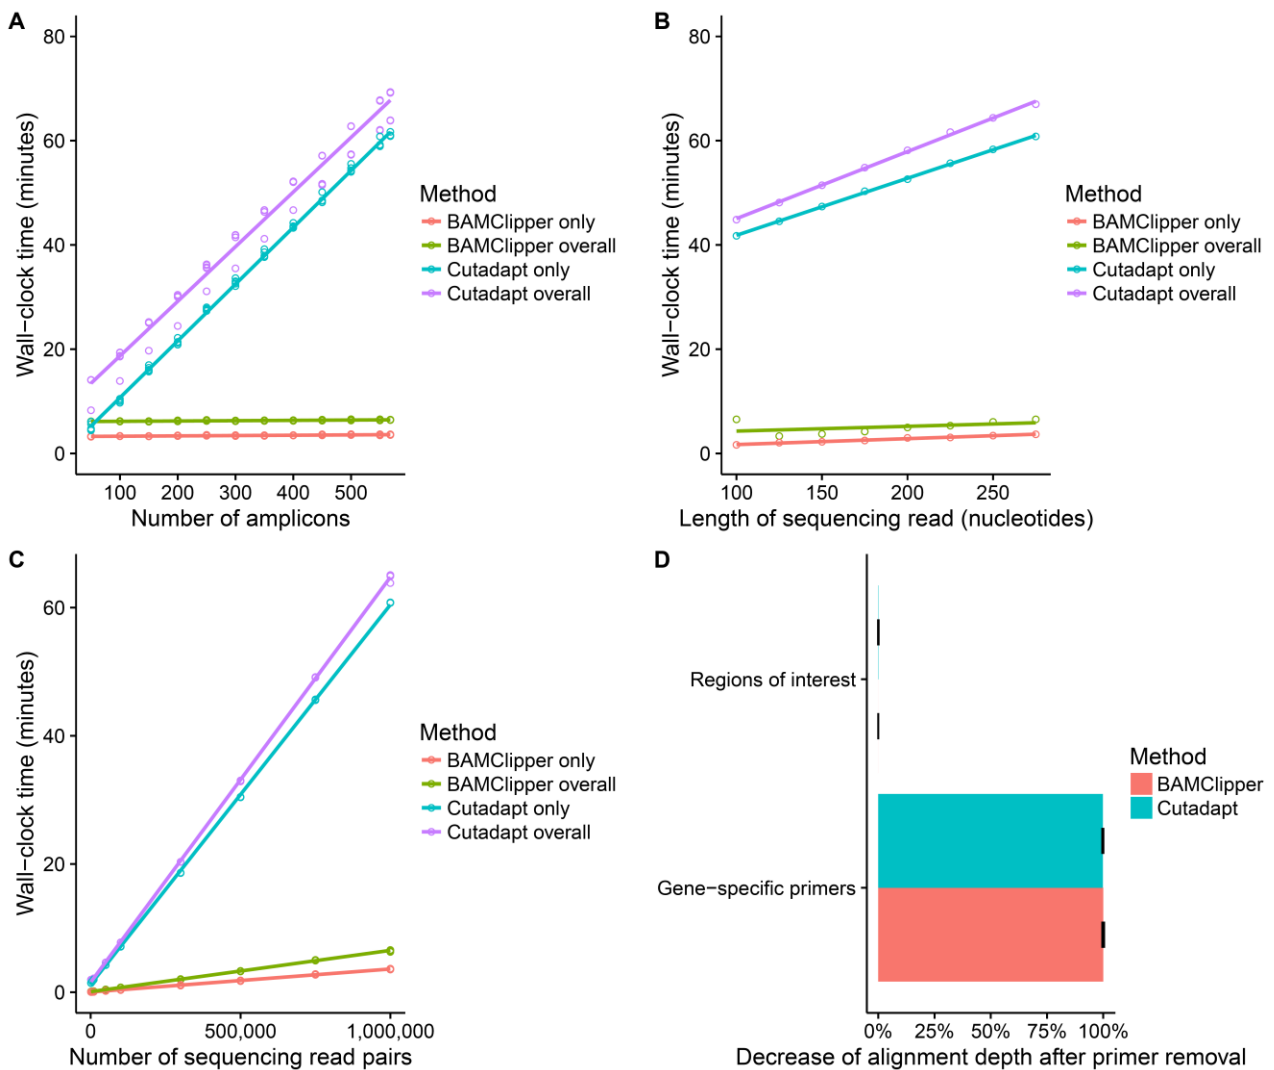

**Supplementary Table S1.** Comparison of primer handling approaches in detecting known variants from the myeloid neoplasm gene panel.

| Sample | Mutation <sup>^</sup>                       | Mutation type    | Approach 1 (Cutadapt)             | Approach 2 | Approach 3 (BAMClipper) |
|--------|---------------------------------------------|------------------|-----------------------------------|------------|-------------------------|
| 1      | <i>JAK2</i> c.1849G>T                       | SNV              | Detected                          | Detected   | Detected                |
| 2      | <i>KIT</i> c.2447A>T                        | SNV              | Detected                          | Detected   | Detected                |
| 3      | <i>MYD88</i> c.794T>C                       | SNV              | Detected                          | Detected   | Detected                |
| 4      | <i>TP53</i> c.916C>T                        | SNV              | Detected                          | Detected   | Detected                |
| 5      | <i>CALR</i> c.1154_1155insTTGTC             | Insertion (5 nt) | Detected                          | Detected   | Detected                |
| 6      | <i>CALR</i> c.1124_1142del                  | Deletion (19 nt) | Detected                          | Detected   | Detected                |
| 7      | <i>CALR</i> c.1103_1136del                  | Deletion (34 nt) | Detected                          | Detected   | Detected                |
| 8      | <i>CALR</i> c.1099_1150del (hotspot type 1) | Deletion (52 nt) | Not detected due to soft-clipping | Detected   | Detected                |

<sup>^</sup>Reference sequences: *CALR*: NM\_004343.3, *JAK2*: NM\_004972.3, *KIT*: NM\_000222.2, *MYD88*: NM\_002468.4, *TP53*: NM\_000546.4

**Supplementary Note.** Source code of BAMClipper and Cutadapt pipelines used in benchmarking.

**BAMClipper pipeline:**

```
#!/bin/bash
# BAMClipper pipeline: FASTQ > BWA-MEM > BAMClipper
# ./bamclipper_pipeline_cray.sh samplename_R1.fastq.gz samplename_R2.fastq.gz
samplename trusight_myeloid.bedpe 16
#
R1=$1
R2=$2
NAME=$3
BEDPE=$4
NUMTHREAD=$5

STARTOVERALL=$(date +%s);
####

# bwa & index
START=$(date +%s);
bwa mem -R '@RG\tID:'$NAME'\tSM:'$NAME -M -t $NUMTHREAD -L 5 ucsc.hg19.fasta $R1 $R2
| samtools view -bS - | samtools sort -@ $NUMTHREAD -m 1536M > ${NAME}.bam && samtools
index ${NAME}.bam
END=$(date +%s);
echo "### bwa" $((END-START))

# bamclipper
START=$(date +%s);
./bamclipper.sh -b ${NAME}.bam -p $BEDPE -n $NUMTHREAD
END=$(date +%s);
echo "### bamclipper" $((END-START))

####
ENDOVERALL=$(date +%s);
echo "#### overall" $((ENDOVERALL-STARTOVERALL))
```

## Cutadapt pipeline:

```
#!/bin/bash
# cutadapt pipeline: FASTQ > split > parallel cutadapt > merge > BWA-MEM
# ./cutadapt_pipeline_cray.sh samplename_R1.fastq.gz samplename_R2.fastq.gz
samplename cutadapt.R1-FR.opts cutadapt.R2-FR.opts 16
#
R1=$1
R2=$2
NAME=$3
CUTADAPTR1=$4
CUTADAPTR2=$5
NUMTHREAD=$6

STARTOVERALL=$(date +%s);
####

# zcat
START=$(date +%s);
zcat $R1 > ${NAME}_R1.fastq
zcat $R2 > ${NAME}_R2.fastq
END=$(date +%s);
echo "### zcat" $((END-START))

# split fastq (fastq-splitter is available from
http://kirill-kryukov.com/study/tools/fastq-splitter/)
START=$(date +%s);
perl fastq-splitter.pl --n-parts $NUMTHREAD ${NAME}_R1.fastq
perl fastq-splitter.pl --n-parts $NUMTHREAD ${NAME}_R2.fastq
END=$(date +%s);
echo "### split" $((END-START))

# parallel cutadapt
START=$(date +%s);
for i in $(seq -w 1 $NUMTHREAD); do
    CUTADAPT_OPTS_R1=`cat $CUTADAPTR1`
    CUTADAPT_OPTS_R2=`cat $CUTADAPTR2`
    echo "cutadapt $CUTADAPT_OPTS_R1 -m 0 -e 0.1 -n 2 ${NAME}_R1.part-$i.fastq -o
${NAME}_R1.part-$i.trimmed.fastq >/dev/null; cutadapt $CUTADAPT_OPTS_R2 -m 0 -e 0.1
```

```

-n 2 ${NAME}_R2.part- $i$ .fastq -o ${NAME}_R2.part- $i$ .trimmed.fastq >/dev/null" >>
 $NAME$ .cutadapt.commands.list
done
parallel --joblog  $NAME$ .cutadapt.parallel.log -j  $NUMTHREAD$  <
 $NAME$ .cutadapt.commands.list
END=$(date +%s);
echo "### cutadapt" $( (END-START))

# merge
START=$(date +%s);
cat  $NAME$ _R1.part-*.trimmed.fastq >  $NAME$ _R1.trimmed.fastq
cat  $NAME$ _R2.part-*.trimmed.fastq >  $NAME$ _R2.trimmed.fastq
END=$(date +%s);
echo "### merge" $( (END-START))

# bwa & index
START=$(date +%s);
bwa mem -R '@RG\tID:' $NAME$ '\tSM:' $NAME$  -M -t  $NUMTHREAD$  -L 5 ucsc.hg19.fasta
 $NAME$ _R1.trimmed.fastq  $NAME$ _R2.trimmed.fastq | samtools view -bS - | samtools
sort -@  $NUMTHREAD$  -m 1536M >  $NAME$ .bam && samtools index  $NAME$ .bam
END=$(date +%s);
echo "### bwa" $( (END-START))

####
ENDOVERALL=$(date +%s);
echo "#### overall" $( (ENDOVERALL-STARTOVERALL))

```
